# Supplementary material
Source: Springer Nature journal article supplement (https://www.springermedizin.de/resource/supplementary/40169_2014_54_MOESM1_ESM.pdf/9675476)

**ES cells  
(2 months)**

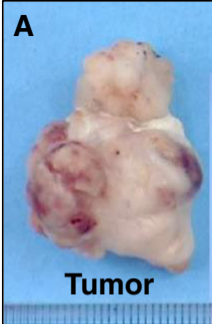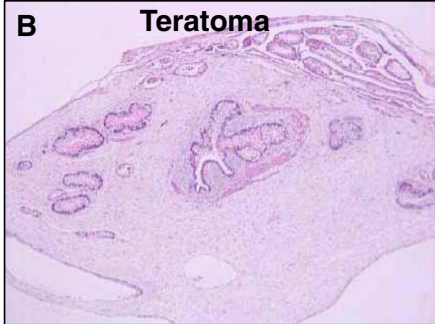

**Muse cells  
(6 months)**

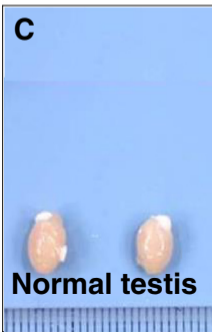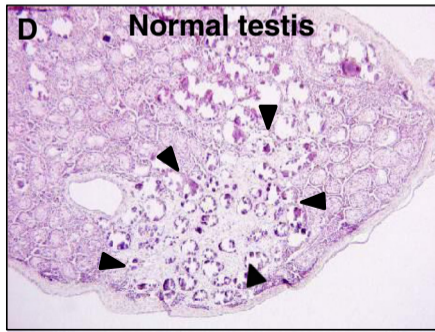

Supplement: MOESM1 [file 9675476]
